# Supplementary material
Source: Research Square preprint supplement (doi:10.21203/rs.3.rs-9139468/v1)
Supplement: Supplementary file 1 [file c3a919942aaf26b447785cd3.docx]

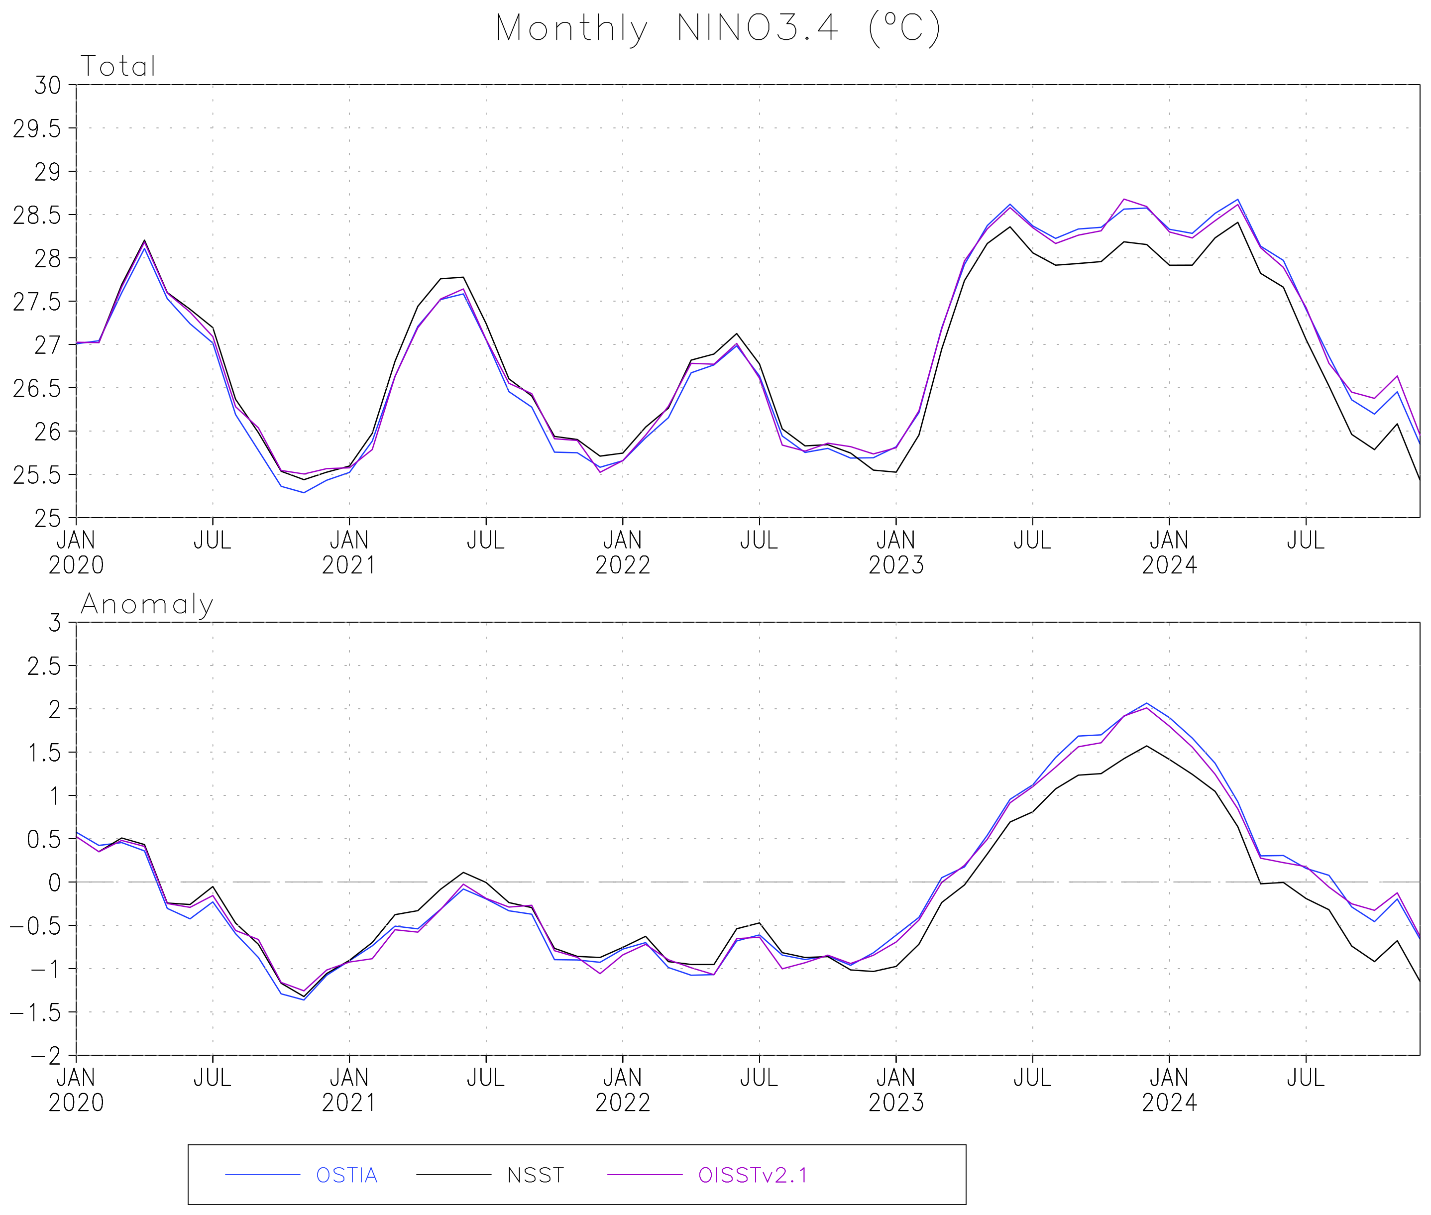


Figure S1 Time series of the monthly Niño-3.4 index: (a) total field and (b) anomaly. The blue, black, and purple lines represent OSTIA, NSST, and OISSTv2.1, respectively.


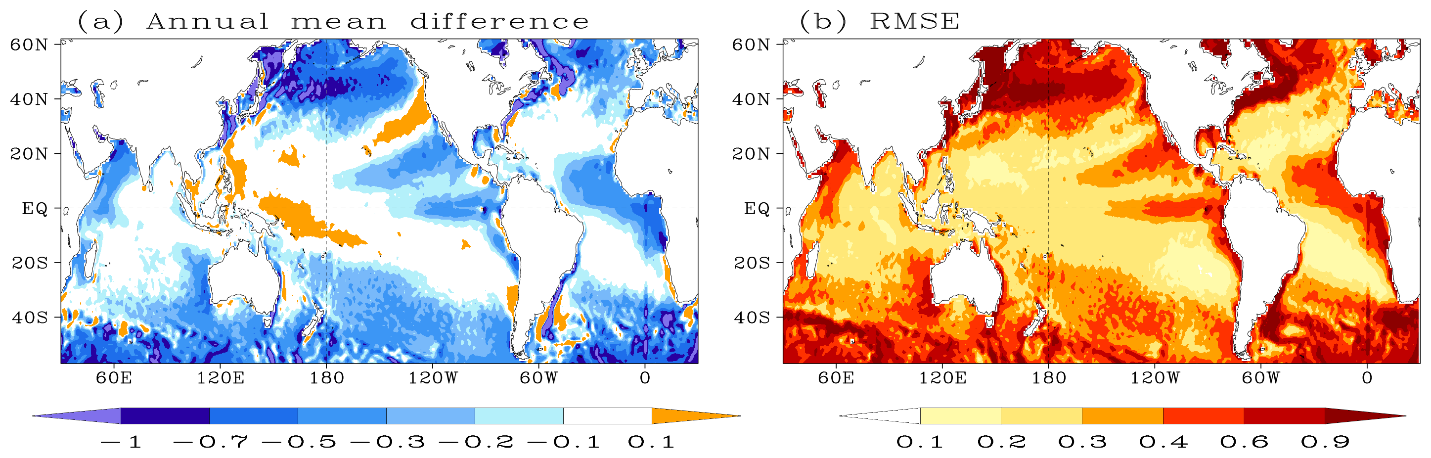


Figure S2 (a) Mean difference and (b) root-mean-square error of monthly SST anomalies between NSST and OSTIA over the period February 2020 to December 2024.
